# Supplementary material for: Programmed Effects in Neurobehavior and Antioxidative Physiology in Zebrafish Embryonically Exposed to Cadmium: Observations and Hypothesized Adverse Outcome Pathway Framework
Source: PubMed Central journal article supplement (PMC5133831; doi:10.3390/ijms17111830), 2016-11-02
Supplement: ijms-17-01830-s001.pdf [file ijms-17-01830-s001.pdf]

# Supplementary Material: Programmed Effects in Neurobehavior and Antioxidative Physiology in Zebrafish Embryonically Exposed to Cadmium: Observations and Hypothesized Adverse Outcome Pathway Framework

Sander Ruiters, Josefine Sippel, Manon C. Bouwmeester, Tobias Lommelaars, Piet Beekhof, Hennie M. Hodemaekers, Frank Bakker, Evert-Jan van den Brandhof, Jeroen L. A. Pennings and Leo T. M. van der Ven

Table S1. Selected reaction monitoring transition parameters.

| Compound | Q1    | Q3    | Time (msec) | Declustering Potential | Entrance Potential | Collision Energy (volts) | CXP (volts) |
|----------|-------|-------|-------------|------------------------|--------------------|--------------------------|-------------|
| 8-OHdG   | 284.1 | 168.0 | 100         | 11                     | 10                 | 17                       | 10.0        |
| 8-OHdG   | 284.1 | 140.0 | 100         | 11                     | 10                 | 43                       | 14.0        |
| 2-dC     | 228.0 | 112.0 | 100         | 20                     | 15                 | 20                       | 10.5        |
| 2-dC     | 228.0 | 95.0  | 100         | 20                     | 5                  | 50                       | 10.5        |
| 2-dG     | 268.1 | 152.1 | 150         | 71                     | 10                 | 15                       | 10.0        |
| 2-dG     | 268.1 | 134.9 | 150         | 71                     | 10                 | 49                       | 14.0        |

Q1, Q3, quadrupole 1, 3; CXP, Collision cell exit potential; 8-OHdG, 8-hydroxy-2-deoxyguanosine; 2-dC, 2-deoxycytidine; 2-dG, 2-deoxyguanosine.
